# Supplementary material
Source: MDPI journal article supplement (https://www.mdpi.com/2311-7524/8/6/549)
Supplement: s1 [file s1]

Effects of shaking and withering processes on the aroma qualities of black tea

Table S1. All volatile compounds detected by GC-MS/MS in the black teas processed under various conditions.

| NO | Name                                                                  | RI <sup>a</sup> | RI <sup>b</sup> | Content (µg/L) |         |         |         |         |         |         |         |         |         |         |         |         |         |         |         |         |         |         |  |
|----|-----------------------------------------------------------------------|-----------------|-----------------|----------------|---------|---------|---------|---------|---------|---------|---------|---------|---------|---------|---------|---------|---------|---------|---------|---------|---------|---------|--|
|    |                                                                       |                 |                 | NS             | WSR1F0  | WSR1F1  | WSR1F2  | WSR1F3  | WSR1F4  | WSR1F5  | WSR2F0  | WSR2F1  | WSR2F2  | WSR2F3  | WSR2F4  | WSR3F0  | WSR3F1  | WSR3F2  | WSR3F3  | WSR4F0  | WSR4F1  | WSR4F2  |  |
| 1  | 2-Methylbutanal                                                       | 654.883         | 659             | 5.280          | 3.866   | 3.481   | 5.247   | 1.494   | 5.000   | 2.111   | 4.154   | 5.939   | 6.118   | 6.107   | 5.417   | 0.514   | 2.618   | 0.616   | 0.490   | 0.986   | 1.266   | 0.372   |  |
| 2  | Hexanal                                                               | 795.242         | 800             | 2.830          | 4.796   | 6.169   | 6.593   | 7.175   | 8.300   | 8.200   | 3.683   | 4.885   | 6.631   | 8.325   | 9.165   | 5.018   | 5.598   | 5.290   | 9.485   | 12.677  | 9.410   | 6.007   |  |
| 3  | trans-2-Hexenal                                                       | 847.000         | 850             | 0.311          | 5.560   | 11.751  | 8.240   | 10.637  | 8.418   | 8.551   | 6.655   | 9.325   | 11.597  | 9.511   | 7.912   | 3.867   | 13.222  | 11.328  | 14.699  | 16.171  | 11.397  | 11.919  |  |
| 4  | Vanillin                                                              | 1003.433        | -               | 1.015          | 1.385   | 0.676   | 0.854   | 0.777   | 0.630   | 0.656   | 0.822   | 0.316   | 0.673   | 0.447   | 0.818   | 0.356   | 0.620   | 1.338   | 1.390   | 0.321   | 0.532   | 1.023   |  |
| 5  | Benzeneacetaldehyde                                                   | 1053.415        | 1049            | 28.628         | 11.030  | 27.330  | 10.574  | 19.952  | 27.075  | 32.022  | 9.801   | 28.788  | 21.543  | 26.532  | 31.439  | 1.542   | 1.925   | 2.650   | 3.902   | 3.818   | 3.889   | 27.607  |  |
| 6  | 2,5-Dihydroxybenzaldehyde                                             | 1127.359        | -               | 3.112          | 5.176   | 2.519   | 3.547   | 3.410   | 2.022   | 1.547   | 3.077   | 2.022   | 2.970   | 2.668   | 3.406   | 1.144   | 2.299   | 2.837   | 3.333   | 3.665   | 2.592   | 1.965   |  |
| 7  | 1-Cyclohexene-1-carboxaldehyde, 2,6,6-trimethyl-                      | 1216.867        | 1214            | 1.441          | 2.025   | 2.245   | 2.610   | 2.671   | 2.377   | 2.577   | 1.917   | 2.162   | 3.022   | 2.857   | 2.719   | 1.005   | 3.104   | 2.110   | 2.951   | 3.394   | 2.062   | 1.837   |  |
| 8  | Styrene                                                               | 902.986         | 890             | 0.204          | 0.015   | 0.172   | 0.009   | 0.143   | 0.062   | 0.060   | 0.102   | 0.013   | 0.242   | 0.407   | 0.015   | 0.022   | 0.125   | 0.019   | 0.088   | 0.136   | 0.073   | 0.025   |  |
| 9  | β-Myrcene                                                             | 1006.568        | 992             | 27.833         | 21.353  | 21.555  | 19.955  | 20.111  | 13.236  | 13.466  | 16.069  | 19.943  | 15.913  | 15.728  | 18.553  | 8.473   | 13.450  | 21.897  | 12.469  | 18.907  | 11.917  | 17.271  |  |
| 10 | D-Limonene                                                            | 1034.021        | 1029            | 4.152          | 3.392   | 3.537   | 2.813   | 3.212   | 2.300   | 1.829   | 2.499   | 3.131   | 2.428   | 2.820   | 2.779   | 0.903   | 2.117   | 3.230   | 2.224   | 2.832   | 2.067   | 2.530   |  |
| 11 | β-Ocimene                                                             | 1057.149        | 1048            | 8.277          | 5.082   | 5.341   | 4.755   | 5.403   | 3.536   | 3.596   | 4.001   | 5.113   | 3.800   | 4.633   | 4.899   | 1.003   | 3.724   | 5.722   | 3.280   | 5.190   | 3.196   | 4.680   |  |
| 12 | 3-Carene                                                              | 1022.247        | 1018            | 11.622         | 6.781   | 7.564   | 6.741   | 6.099   | 4.775   | 5.030   | 5.257   | 5.416   | 5.686   | 6.476   | 6.733   | 3.352   | 5.512   | 6.663   | 4.227   | 5.746   | 4.378   | 6.010   |  |
| 13 | 4-Ethenyl-1,2-dimethyl-benzene                                        | 1104.438        | -               | 0.609          | 8.365   | 1.797   | 1.719   | 6.953   | 7.236   | 3.151   | 2.605   | 6.392   | 6.459   | 5.649   | 2.855   | 0.231   | 0.301   | 0.292   | 0.377   | 0.473   | 0.354   | 0.373   |  |
| 14 | 1,5-Dimethyl-1,3-cyclohexadiene                                       | 1189.792        | -               | 8.575          | 1.643   | 1.510   | 1.386   | 0.761   | 0.620   | 0.878   | 0.851   | 0.830   | 0.997   | 1.077   | 0.723   | 0.213   | 1.793   | 7.543   | 7.911   | 5.375   | 2.299   | 5.561   |  |
| 15 | Bicyclo[7.2.0]undec-4-ene,4,11,11-trimethyl-8-methylene-, (1R,4Z,9S)- | 1352.962        | -               | 0.944          | 8.001   | 7.697   | 6.289   | 5.429   | 5.758   | 5.364   | 5.555   | 6.983   | 6.778   | 5.491   | 5.557   | 31.805  | 108.052 | 83.887  | 124.201 | 118.853 | 100.443 | 101.927 |  |
| 16 | 4,7-Dimethyl-1-propan-2-yl-1,2,3,5,6,8a-hexahydronaphthalene          | 1433.912        | -               | 4.937          | 3.669   | 3.529   | 3.307   | 2.397   | 1.816   | 3.457   | 2.638   | 3.202   | 3.046   | 3.273   | 2.968   | 1.217   | 11.215  | 11.226  | 13.223  | 16.873  | 6.251   | 13.204  |  |
| 17 | α-Calacorene                                                          | 1549.789        | 1546            | 4.121          | 0.607   | 0.335   | 0.443   | 0.798   | 0.714   | 0.787   | 0.664   | 0.760   | 0.342   | 0.525   | 0.489   | 3.292   | 4.978   | 5.109   | 5.083   | 5.428   | 4.211   | 4.832   |  |
| 18 | (S)-(+)-3-Methyl-1-pentanol                                           | 828.600         | -               | 0.233          | 0.798   | 0.199   | 0.378   | 4.454   | 3.302   | 0.549   | 3.055   | 2.067   | 15.923  | 3.816   | 6.883   | 2.509   | 10.340  | 9.500   | 12.683  | 9.251   | 11.380  | 8.565   |  |
| 19 | 3-Methyl-2-heptanol                                                   | 1038.201        | -               | 2.216          | 0.004   | 0.745   | 0.011   | 0.071   | 1.439   | 1.200   | 0.650   | 0.611   | 0.232   | 1.468   | 0.927   | 0.143   | 2.490   | 0.240   | 0.280   | 0.682   | 0.177   | 0.156   |  |
| 20 | Hydroxylamine, O-(diphenylmethyl)-                                    | 1101.759        | -               | 2.319          | 1.909   | 1.908   | 1.614   | 1.323   | 1.227   | 1.155   | 1.208   | 1.691   | 1.254   | 1.584   | 1.570   | 0.721   | 1.465   | 1.499   | 1.311   | 1.821   | 1.063   | 0.733   |  |
| 21 | Linalool                                                              | 1111.691        | 1100            | 133.937        | 127.241 | 119.520 | 101.154 | 88.391  | 92.048  | 72.935  | 83.726  | 78.178  | 91.204  | 91.316  | 87.084  | 38.619  | 77.163  | 64.671  | 63.865  | 85.001  | 50.708  | 36.001  |  |
| 22 | 3,7-Dimethyl-1,5,7-octatrien-3-ol                                     | 1115.257        | 1108            | 86.726         | 55.103  | 45.368  | 50.814  | 34.082  | 48.998  | 36.974  | 38.685  | 37.102  | 22.400  | 63.686  | 46.163  | 37.105  | 26.931  | 29.022  | 34.835  | 47.822  | 25.951  | 15.487  |  |
| 23 | (3R,6S)-2,2,6-Trimethyl-6-vinyltetrahydro-2H-pyran-3-ol               | 1172.815        | 1183            | 12.673         | 9.017   | 9.664   | 11.142  | 8.849   | 10.331  | 9.498   | 9.936   | 9.334   | 9.379   | 12.382  | 13.325  | 1.186   | 13.632  | 14.652  | 13.942  | 13.655  | 11.919  | 11.139  |  |
| 24 | α-Terpineol                                                           | 1183.828        | 1193            | 1.597          | 1.315   | 1.349   | 1.265   | 1.065   | 1.081   | 1.058   | 1.105   | 1.035   | 1.292   | 1.313   | 1.216   | 0.269   | 1.058   | 1.046   | 0.225   | 1.254   | 0.620   | 0.763   |  |
| 25 | Geraniol                                                              | 1251.468        | 1257            | 341.232        | 262.717 | 240.466 | 259.121 | 207.200 | 228.265 | 231.352 | 215.484 | 204.859 | 266.268 | 246.829 | 254.265 | 260.169 | 251.332 | 168.633 | 216.046 | 279.394 | 136.637 | 130.037 |  |
| 26 | 1,10-Di-epi-cubenol                                                   | 1613.827        | 1623            | 2.465          | 1.950   | 1.793   | 2.579   | 2.152   | 0.735   | 1.947   | 2.816   | 2.406   | 2.808   | 2.574   | 2.482   | 0.950   | 1.192   | 1.257   | 0.763   | 0.724   | 0.686   | 0.455   |  |
| 27 | 2,6-Bis-tert-butyl-4-methylcyclohexanol                               | 1519.924        | -               | 0.117          | 1.330   | 0.106   | 0.123   | 0.182   | 0.354   | 0.105   | 0.151   | 0.563   | 0.146   | 0.115   | 0.120   | 1.249   | 2.553   | 1.841   | 2.367   | 2.251   | 2.133   | 1.572   |  |
| 28 | τ-Cadinol                                                             | 1635.190        | 1640            | 6.117          | 4.698   | 3.969   | 4.671   | 4.160   | 4.964   | 4.769   | 4.970   | 4.564   | 5.430   | 5.310   | 4.602   | 0.079   | 0.129   | 0.079   | 0.153   | 0.139   | 0.102   | 0.102   |  |
| 29 | cis-3-Hexenyl acetate                                                 | 979.925         | -               | 0.282          | 8.425   | 1.728   | 3.834   | 2.215   | 0.132   | 0.117   | 1.557   | 0.991   | 0.281   | 1.190   | 0.210   | 0.062   | 0.169   | 0.176   | 0.105   | 0.338   | 0.976   | 1.591   |  |
| 30 | cis-5-Ethenyltetrahydro-α,α-5-trimethyl-2-furanmethanol               | 1088.762        | 1078            | 27.448         | 21.515  | 21.608  | 17.800  | 14.446  | 15.758  | 11.808  | 15.293  | 18.002  | 13.742  | 18.185  | 18.192  | 7.751   | 15.624  | 15.720  | 13.728  | 17.217  | 8.625   | 7.311   |  |
| 31 | Ethyl 2-(5-methyl-5-vinyltetrahydrofuran-2-yl)propan-2-yl carbonate   | 1101.746        | 1090            | 89.200         | 75.477  | 71.477  | 59.340  | 50.248  | 47.899  | 41.996  | 50.290  | 61.731  | 59.696  | 59.708  | 57.756  | 28.288  | 58.616  | 56.672  | 51.230  | 64.129  | 31.504  | 29.227  |  |
| 32 | 2-Propyn-1-ol,1-acetate                                               | 1111.659        | -               | 5.574          | 5.416   | 5.309   | 4.556   | 3.946   | 3.451   | 2.931   | 3.605   | 3.881   | 4.054   | 3.966   | 3.140   | 1.581   | 2.726   | 2.737   | 2.090   | 3.262   | 2.033   | 1.663   |  |
| 33 | trans-Butanoic acid, 3-hexenyl ester                                  | 1180.185        | -               | 7.934          | 22.516  | 23.872  | 18.554  | 13.658  | 15.509  | 10.046  | 12.156  | 10.193  | 11.282  | 13.407  | 10.485  | 2.234   | 7.529   | 5.536   | 3.494   | 8.729   | 2.059   | 2.778   |  |
| 34 | Methyl salicylate                                                     | 1187.015        | 1190            | 122.546        | 74.029  | 83.950  | 80.601  | 65.840  | 86.993  | 63.275  | 64.305  | 74.834  | 72.939  | 79.527  | 66.656  | 27.853  | 60.918  | 37.596  | 45.860  | 78.060  | 12.525  | 28.450  |  |
| 35 | n-Valeric acid cis-3-hexenyl ester                                    | 1222.118        | 1239            | 8.385          | 18.013  | 21.065  | 16.906  | 12.536  | 10.502  | 11.574  | 10.695  | 11.959  | 9.012   | 10.976  | 9.614   | 4.588   | 7.957   | 8.559   | 7.931   | 8.661   | 5.089   | 6.101   |  |
| 36 | Butanedioic acid, bis(2-methylpropyl) ester                           | 1475.977        | -               | 2.008          | 3.309   | 265.227 | 224.747 | 180.645 | 260.179 | 148.824 | 193.540 | 236.596 | 129.359 | 195.626 | 59.966  | 66.579  | 54.024  | 54.992  | 80.490  | 170.136 | 91.148  | 51.816  |  |
| 37 | 2-Ethylhexyl acetate                                                  | 1148.916        | -               | 0.060          | 0.321   | 0.365   | 0.383   | 0.325   | 0.579   | 0.302   | 0.281   | 0.122   | 0.147   | 0.218   | 0.136   | 0.043   | 0.214   | 0.109   | 0.140   | 0.096   | 0.134   | 0.153   |  |
| 38 | trans-Geranic acid methyl ester                                       | 1299.541        | 1321.7          | 0.246          | 0.710   | 0.908   | 0.730   | 0.700   | 0.568   | 0.515   | 0.596   | 0.528   | 0.179   | 0.664   | 0.316   | 0.171   | 0.473   | 0.028   | 0.374   | 0.510   | 0.226   | 0.157   |  |
| 39 | cis-3-Hexenyl cis-hexanoate                                           | 1329.136        | -               | 26.082         | 100.349 | 104.852 | 97.818  | 61.338  | 60.770  | 62.912  | 66.123  | 59.809  | 59.532  | 69.301  | 58.196  | 22.187  | 54.145  | 47.687  | 35.478  | 41.876  | 29.592  | 33.418  |  |

|    |                                                                        |          |        |       |       |        |        |       |        |        |       |        |        |        |       |       |       |       |       |       |       |       |
|----|------------------------------------------------------------------------|----------|--------|-------|-------|--------|--------|-------|--------|--------|-------|--------|--------|--------|-------|-------|-------|-------|-------|-------|-------|-------|
| 40 | Hexyl hexanoate                                                        | 1371.322 | 1385   | 2.132 | 7.024 | 7.010  | 6.966  | 3.300 | 3.843  | 4.349  | 3.989 | 3.413  | 4.893  | 5.766  | 3.595 | 1.428 | 3.492 | 1.643 | 2.247 | 3.336 | 2.114 | 1.882 |
| 41 | 2,2,6-Trimethylcyclohexanone                                           | 1018.439 | 1022.9 | 1.441 | 0.226 | 0.289  | 0.317  | 0.260 | 0.298  | 0.296  | 0.219 | 0.328  | 0.262  | 0.258  | 0.422 | 0.174 | 0.265 | 0.325 | 0.215 | 0.444 | 0.252 | 0.236 |
| 42 | 4,7-Dimethyl-4,4a,5,6-tetrahydrocyclopenta[c]pyran-1,3-dione           | 1210.361 | -      | 1.688 | 0.838 | 1.020  | 1.035  | 0.798 | 1.026  | 0.969  | 0.731 | 0.884  | 1.109  | 1.170  | 1.054 | 0.267 | 0.832 | 0.950 | 0.612 | 0.967 | 0.584 | 0.597 |
| 43 | trans-8-Methyl-3,7-nonadien-2-one                                      | 1225.402 | -      | 0.648 | 0.497 | 2.616  | 0.717  | 0.367 | 0.762  | 0.633  | 6.535 | 0.601  | 0.629  | 0.809  | 0.804 | 0.016 | 1.009 | 0.683 | 0.824 | 1.004 | 0.685 | 0.476 |
| 44 | β-Ionone                                                               | 1476.623 | 1484   | 9.282 | 7.520 | 10.174 | 11.521 | 9.155 | 14.155 | 12.203 | 9.669 | 10.124 | 11.008 | 14.791 | 4.791 | 0.222 | 0.762 | 0.659 | 0.637 | 0.510 | 0.533 | 0.545 |
| 45 | 2-Ethylfuran                                                           | 750.514  | -      | 1.703 | 1.669 | 1.650  | 3.285  | 2.749 | 3.695  | 2.130  | 2.234 | 1.702  | 3.410  | 4.015  | 4.089 | 3.160 | 3.418 | 3.395 | 3.318 | 4.079 | 2.335 | 0.485 |
| 46 | Toluene                                                                | 774.068  | -      | 0.505 | 0.652 | 0.754  | 0.556  | 0.704 | 0.643  | 1.151  | 1.154 | 17.349 | 1.854  | 1.300  | 1.324 | 1.706 | 1.849 | 1.485 | 1.624 | 1.155 | 0.503 | 1.506 |
| 47 | Furfurylmethylamphetamine                                              | 1026.202 | -      | 1.863 | 2.335 | 2.957  | 3.188  | 2.643 | 3.209  | 2.505  | 2.257 | 2.028  | 3.061  | 3.583  | 3.961 | 2.808 | 2.703 | 3.041 | 3.427 | 3.590 | 3.032 | 0.993 |
| 48 | (1S,4S,4aS)-1-Isopropyl-4,7-dimethyl-1,2,3,4,4a,5-hexahydronaphthalene | 1300.372 | -      | 1.109 | 2.212 | 2.333  | 2.220  | 1.931 | 1.857  | 1.701  | 1.914 | 2.137  | 2.478  | 1.879  | 1.819 | 1.203 | 2.071 | 1.953 | 1.903 | 2.497 | 1.343 | 1.476 |
| 49 | 1,2-Dihydro-4,5,7-trimethyl-naphthalene                                | 1303.274 | -      | 0.663 | 0.388 | 0.448  | 0.497  | 0.271 | 0.158  | 0.462  | 0.276 | 0.223  | 0.245  | 0.566  | 0.178 | 0.147 | 0.154 | 0.205 | 0.193 | 0.158 | 0.091 | 0.077 |
| 50 | Hexanoic anhydride                                                     | 1336.192 | -      | 2.509 | 6.082 | 7.206  | 6.804  | 3.221 | 3.595  | 3.622  | 5.145 | 3.076  | 4.053  | 4.908  | 2.645 | 0.505 | 2.509 | 2.571 | 2.405 | 2.882 | 2.786 | 2.369 |
| 51 | 2,4,6-Tri-tert-butylphenol                                             | 1496.924 | -      | 0.886 | 1.521 | 1.022  | 1.863  | 1.133 | 0.864  | 1.080  | 0.506 | 1.397  | 1.935  | 1.140  | 1.522 | 1.783 | 2.261 | 3.021 | 3.227 | 2.726 | 2.937 | 2.521 |

| NO | Name                                                                  | RI <sup>a</sup> | RI <sup>b</sup> | Content (µg/L) |         |         |         |         |         |         |         |         |         |         |         |         |         |         |         |         |         |
|----|-----------------------------------------------------------------------|-----------------|-----------------|----------------|---------|---------|---------|---------|---------|---------|---------|---------|---------|---------|---------|---------|---------|---------|---------|---------|---------|
|    |                                                                       |                 |                 | SWR1F0         | SWR1F1  | SWR1F2  | SWR1F3  | SWR1F4  | SWR1F5  | SWR2F0  | SWR2F1  | SWR2F2  | SWR2F3  | SWR2F4  | SWR3F0  | SWR3F1  | SWR3F2  | SWR3F3  | SWR4F0  | SWR4F1  | SWR4F2  |
| 1  | 2-Methylbutanal                                                       | 654.883         | 659             | 2.231          | 0.374   | 0.358   | 0.426   | 0.931   | 1.715   | 2.846   | 1.528   | 0.663   | 4.116   | 2.798   | 0.557   | 4.731   | 4.447   | 3.084   | 1.479   | 0.403   | 0.103   |
| 2  | Hexanal                                                               | 795.242         | 800             | 0.896          | 1.872   | 2.074   | 3.235   | 1.813   | 1.974   | 2.895   | 0.933   | 2.839   | 2.944   | 4.197   | 1.925   | 3.093   | 2.376   | 5.690   | 4.098   | 2.053   | 6.374   |
| 3  | trans-2-Hexenal                                                       | 847.000         | 850             | 0.283          | 1.705   | 0.179   | 4.407   | 2.607   | 1.743   | 0.483   | 0.102   | 1.238   | 2.196   | 2.681   | 5.208   | 3.003   | 0.282   | 1.113   | 1.026   | 4.110   | 4.988   |
| 4  | Vanillin                                                              | 1003.433        | -               | 1.539          | 1.727   | 0.801   | 1.110   | 0.967   | 1.365   | 1.585   | 0.984   | 0.877   | 0.363   | 1.082   | 1.523   | 1.442   | 1.541   | 1.153   | 1.085   | 1.228   | 1.416   |
| 5  | Benzeneacetaldehyde                                                   | 1053.415        | 1049            | 4.170          | 3.623   | 3.614   | 2.785   | 20.360  | 29.531  | 3.796   | 8.719   | 19.123  | 15.829  | 22.532  | 27.694  | 30.966  | 39.808  | 43.485  | 40.314  | 32.860  | 2.531   |
| 6  | 2,5-Dihydroxybenzaldehyde                                             | 1127.359        | -               | 3.188          | 2.191   | 2.470   | 1.667   | 2.211   | 3.763   | 3.821   | 1.193   | 4.144   | 3.560   | 2.454   | 3.817   | 3.193   | 3.192   | 2.975   | 2.903   | 2.593   | 1.959   |
| 7  | 1-Cyclohexene-1-carboxaldehyde, 2,6,6-trimethyl-                      | 1216.867        | 1214            | 1.241          | 1.333   | 1.488   | 1.542   | 1.463   | 1.640   | 1.285   | 1.296   | 2.032   | 1.895   | 2.037   | 1.263   | 2.070   | 2.074   | 2.354   | 2.030   | 1.923   | 2.761   |
| 8  | Styrene                                                               | 902.986         | 890             | 0.049          | 0.179   | 0.022   | 0.012   | 0.049   | 0.073   | 0.027   | 0.013   | 0.031   | 0.189   | 0.053   | 0.039   | 0.059   | 0.018   | 0.479   | 0.187   | 0.070   | 0.060   |
| 9  | β-Myrcene                                                             | 1006.568        | 992             | 21.473         | 20.061  | 20.770  | 19.317  | 16.176  | 23.957  | 19.958  | 19.586  | 21.619  | 21.706  | 24.643  | 19.023  | 24.599  | 25.775  | 31.261  | 24.569  | 22.788  | 25.934  |
| 10 | D-Limonene                                                            | 1034.021        | 1029            | 3.616          | 3.290   | 3.352   | 3.215   | 3.249   | 3.814   | 2.740   | 2.872   | 2.409   | 3.402   | 3.972   | 3.120   | 3.924   | 4.113   | 4.574   | 3.671   | 3.260   | 4.017   |
| 11 | β-Ocimene                                                             | 1057.149        | 1048            | 6.585          | 5.505   | 5.673   | 5.396   | 3.748   | 6.914   | 5.264   | 5.146   | 6.359   | 6.074   | 7.106   | 5.290   | 7.433   | 8.573   | 9.153   | 6.569   | 6.172   | 7.917   |
| 12 | 3-Carene                                                              | 1022.247        | 1018            | 7.601          | 7.198   | 6.939   | 7.367   | 7.292   | 7.542   | 7.145   | 6.995   | 8.853   | 8.350   | 9.740   | 9.070   | 10.401  | 11.209  | 12.977  | 9.242   | 8.168   | 7.349   |
| 13 | 4-Ethenyl-1,2-dimethyl-benzene                                        | 1104.438        | -               | 0.525          | 0.451   | 0.507   | 0.337   | 0.548   | 0.449   | 0.196   | 0.435   | 0.486   | 0.435   | 0.644   | 0.512   | 0.486   | 0.609   | 0.520   | 0.576   | 0.422   | 0.481   |
| 14 | 1,5-Dimethyl-1,3-cyclohexadiene                                       | 1189.792        | -               | 8.094          | 3.724   | 5.632   | 2.130   | 4.031   | 4.926   | 5.220   | 1.456   | 10.088  | 7.546   | 6.489   | 3.638   | 8.341   | 4.127   | 2.921   | 4.453   | 7.777   | 9.508   |
| 15 | Bicyclo[7.2.0]undec-4-ene,4,11,11-trimethyl-8-methylene-, (1R,4Z,9S)- | 1352.962        | -               | 100.000        | 121.210 | 100.000 | 95.327  | 97.472  | 87.477  | 100.000 | 93.068  | 94.282  | 97.444  | 100.568 | 97.406  | 91.747  | 81.964  | 103.318 | 94.228  | 91.400  | 96.777  |
| 16 | 4,7-Dimethyl-1-propan-2-yl-1,2,3,5,6,8a-hexahydronaphthalene          | 1433.912        | -               | 7.608          | 7.061   | 5.938   | 8.787   | 2.658   | 9.342   | 5.782   | 8.638   | 8.226   | 9.908   | 4.316   | 9.264   | 17.237  | 11.678  | 14.396  | 11.937  | 11.742  | 20.046  |
| 17 | α-Calacorene                                                          | 1549.789        | 1546            | 7.619          | 5.451   | 5.090   | 4.935   | 6.143   | 6.287   | 5.923   | 5.486   | 7.839   | 7.233   | 8.590   | 7.437   | 7.473   | 6.740   | 7.633   | 7.022   | 6.153   | 7.924   |
| 18 | (S)-(+)-3-Methyl-1-pentanol                                           | 828.600         | -               | 0.023          | 0.293   | 0.344   | 0.640   | 0.694   | 0.113   | 0.397   | 0.314   | 0.038   | 2.081   | 4.100   | 3.553   | 2.547   | 6.336   | 7.436   | 0.842   | 2.214   | 6.860   |
| 19 | 3-Methyl-2-heptanol                                                   | 1038.201        | -               | 2.309          | 0.538   | 0.086   | 0.801   | 3.840   | 0.150   | 2.099   | 0.530   | 4.090   | 2.168   | 3.651   | 8.518   | 11.283  | 12.960  | 17.397  | 10.348  | 8.366   | 29.798  |
| 20 | Hydroxylamine, O-(diphenylmethyl)-                                    | 1101.759        | -               | 1.764          | 1.753   | 1.763   | 1.981   | 1.833   | 1.856   | 1.713   | 1.589   | 2.179   | 1.952   | 2.053   | 2.022   | 2.387   | 2.038   | 2.234   | 1.902   | 1.737   | 2.371   |
| 21 | Linalool                                                              | 1111.691        | 1100            | 118.305        | 112.610 | 109.694 | 93.954  | 120.479 | 111.080 | 123.763 | 97.079  | 149.770 | 116.069 | 114.085 | 93.513  | 127.218 | 105.630 | 103.780 | 99.344  | 87.792  | 86.222  |
| 22 | 3,7-Dimethyl-1,5,7-octatrien-3-ol                                     | 1115.257        | 1108            | 32.365         | 39.641  | 45.658  | 31.157  | 43.184  | 42.935  | 40.416  | 32.268  | 54.891  | 70.236  | 56.977  | 31.031  | 82.557  | 44.983  | 34.919  | 34.132  | 24.044  | 49.234  |
| 23 | (3R,6S)-2,2,6-Trimethyl-6-vinyltetrahydro-2H-pyran-3-ol               | 1172.815        | 1183            | 6.996          | 8.999   | 9.639   | 11.893  | 11.903  | 14.029  | 3.854   | 8.988   | 13.740  | 12.938  | 14.329  | 10.375  | 13.300  | 13.335  | 16.167  | 13.098  | 13.583  | 19.699  |
| 24 | α-Terpineol                                                           | 1183.828        | 1193            | 1.176          | 1.214   | 1.234   | 1.430   | 1.251   | 1.172   | 1.198   | 1.207   | 1.586   | 1.371   | 1.395   | 1.014   | 1.527   | 1.203   | 1.469   | 1.174   | 1.284   | 1.667   |
| 25 | Geraniol                                                              | 1251.468        | 1257            | 277.908        | 327.969 | 262.850 | 301.596 | 291.704 | 300.979 | 279.775 | 287.049 | 363.468 | 303.044 | 355.596 | 358.260 | 372.341 | 304.397 | 358.721 | 336.764 | 285.897 | 418.795 |
| 26 | 1,10-Di-epi-cubenol                                                   | 1613.827        | 1623            | 1.104          | 1.003   | 0.632   | 0.773   | 0.708   | 0.712   | 0.575   | 1.422   | 1.584   | 1.242   | 1.251   | 0.979   | 0.940   | 0.633   | 0.564   | 1.076   | 1.421   | 1.632   |
| 27 | 2,6-Bis-tert-butyl-4-methylcyclohexanol                               | 1519.924        | -               | 2.163          | 3.062   | 2.728   | 1.946   | 1.871   | 2.545   | 2.765   | 2.629   | 3.445   | 2.961   | 2.719   | 2.090   | 2.795   | 2.630   | 1.086   | 2.784   | 2.131   | 2.871   |
| 28 | τ-Cadinol                                                             | 1635.190        | 1640            | 0.096          | 0.108   | 0.328   | 0.131   | 0.113   | 0.120   | 0.130   | 0.111   | 0.119   | 0.120   | 0.147   | 0.109   | 0.139   | 0.124   | 0.061   | 0.125   | 0.093   | 0.129   |
| 29 | cis-3-Hexenyl acetate                                                 | 979.925         | -               | 0.692          | 1.739   | 0.168   | 1.793   | 0.186   | 0.165   | 1.035   | 1.567   | 0.201   | 0.250   | 0.218   | 0.395   | 0.458   | 0.295   | 0.257   | 0.227   | 0.177   | 0.459   |
| 30 | cis-5-Ethenyltetrahydro-α,α-5-trimethyl-2-furanmethanol               | 1088.762        | 1078            | 21.942         | 21.405  | 22.188  | 23.660  | 24.425  | 22.929  | 19.314  | 17.308  | 25.115  | 22.735  | 24.140  | 17.054  | 26.980  | 23.246  | 24.248  | 21.980  | 18.590  | 26.115  |

|    |                                                                        |          |        |         |         |         |         |        |         |         |         |         |         |         |         |         |         |         |         |        |        |
|----|------------------------------------------------------------------------|----------|--------|---------|---------|---------|---------|--------|---------|---------|---------|---------|---------|---------|---------|---------|---------|---------|---------|--------|--------|
| 31 | Ethyl 2-(5-methyl-5-vinyltetrahydrofuran-2-yl)propan-2-yl carbonate    | 1101.746 | 1090   | 68.362  | 67.802  | 68.053  | 75.213  | 80.444 | 73.337  | 66.714  | 59.691  | 94.093  | 75.671  | 80.894  | 58.824  | 91.238  | 79.742  | 90.692  | 84.541  | 66.447 | 93.720 |
| 32 | 2-Propyn-1-ol,1-acetate                                                | 1111.659 | -      | 5.250   | 4.850   | 4.911   | 5.059   | 5.198  | 4.188   | 4.018   | 3.075   | 6.566   | 5.109   | 4.913   | 3.914   | 5.980   | 4.325   | 4.417   | 4.253   | 4.111  | 2.563  |
| 33 | trans-Butanoic acid, 3-hexenyl ester                                   | 1180.185 | -      | 4.857   | 3.901   | 3.773   | 3.478   | 2.904  | 2.667   | 2.863   | 2.938   | 3.968   | 2.583   | 3.673   | 2.970   | 3.657   | 2.247   | 2.558   | 2.281   | 2.239  | 1.337  |
| 34 | Methyl salicylate                                                      | 1187.015 | 1190   | 61.583  | 79.862  | 70.089  | 67.489  | 73.877 | 97.067  | 91.992  | 77.775  | 72.512  | 89.070  | 104.411 | 77.837  | 108.776 | 76.039  | 100.932 | 66.534  | 75.293 | 95.248 |
| 35 | n-Valeric acid cis-3-hexenyl ester                                     | 1222.118 | 1239   | 3.588   | 2.768   | 2.373   | 1.445   | 2.531  | 1.769   | 1.293   | 1.185   | 3.091   | 1.902   | 2.547   | 1.810   | 2.896   | 2.050   | 2.188   | 1.897   | 2.271  | 2.532  |
| 36 | Butanedioic acid, bis(2-methylpropyl) ester                            | 1475.977 | -      | 109.701 | 186.745 | 169.485 | 167.732 | 41.217 | 107.695 | 134.409 | 103.282 | 179.318 | 183.815 | 162.145 | 139.352 | 178.097 | 130.373 | 140.791 | 102.167 | 51.822 | 63.675 |
| 37 | 2-Ethylhexyl acetate                                                   | 1148.916 | -      | 0.149   | 0.072   | 0.095   | 0.083   | 0.150  | 0.155   | 0.110   | 0.086   | 0.157   | 0.154   | 0.086   | 0.120   | 0.149   | 0.120   | 0.079   | 0.085   | 0.083  | 0.160  |
| 38 | trans-Geranic acid methyl ester                                        | 1299.541 | 1321.7 | 0.323   | 0.422   | 0.195   | 0.164   | 0.243  | 0.154   | 0.006   | 0.108   | 0.262   | 0.011   | 0.349   | 0.214   | 0.150   | 0.152   | 0.147   | 0.011   | 0.199  | 0.263  |
| 39 | cis-3-Hexenyl cis-hexanoate                                            | 1329.136 | -      | 27.996  | 19.994  | 15.920  | 10.514  | 11.473 | 13.450  | 12.806  | 13.504  | 20.298  | 16.892  | 23.507  | 19.812  | 22.681  | 16.155  | 13.838  | 14.704  | 19.885 | 21.137 |
| 40 | Hexyl hexanoate                                                        | 1371.322 | 1385   | 1.798   | 1.091   | 0.714   | 0.759   | 1.176  | 0.666   | 0.882   | 0.815   | 0.981   | 1.063   | 0.928   | 0.993   | 1.412   | 0.671   | 0.718   | 0.645   | 0.818  | 0.727  |
| 41 | 2,2,6-Trimethylcyclohexanone                                           | 1018.439 | 1022.9 | 0.102   | 0.112   | 0.155   | 0.134   | 0.166  | 0.169   | 0.077   | 0.095   | 0.215   | 0.213   | 0.178   | 0.097   | 0.243   | 0.210   | 0.164   | 0.183   | 0.194  | 0.198  |
| 42 | 4,7-Dimethyl-4,4a,5,6-tetrahydrocyclopenta[c]pyran-1,3-dione           | 1210.361 | -      | 0.674   | 0.792   | 0.747   | 1.039   | 1.136  | 1.056   | 0.779   | 0.762   | 1.166   | 1.082   | 1.317   | 0.684   | 1.032   | 0.894   | 1.042   | 0.970   | 0.871  | 1.341  |
| 43 | trans-8-Methyl-3,7-nonadien-2-one                                      | 1225.402 | -      | 0.333   | 0.471   | 0.613   | 0.466   | 0.453  | 0.491   | 0.415   | 8.157   | 5.831   | 0.493   | 0.656   | 0.444   | 0.590   | 0.411   | 5.871   | 0.498   | 0.408  | 1.058  |
| 44 | β-Ionone                                                               | 1476.623 | 1484   | 1.442   | 0.800   | 0.765   | 0.863   | 1.109  | 0.958   | 0.868   | 1.100   | 1.618   | 1.239   | 1.586   | 1.410   | 1.125   | 0.840   | 0.750   | 1.166   | 1.354  | 0.614  |
| 45 | 2-Ethylfuran                                                           | 750.514  | -      | 0.839   | 1.126   | 0.862   | 0.744   | 1.627  | 1.462   | 1.427   | 0.735   | 1.589   | 1.587   | 1.810   | 1.103   | 1.722   | 1.916   | 2.411   | 1.495   | 1.413  | 2.317  |
| 46 | Toluene                                                                | 774.068  | -      | 0.569   | 0.972   | 0.639   | 0.935   | 1.718  | 1.347   | 1.006   | 4.789   | 2.478   | 0.619   | 1.076   | 1.148   | 1.252   | 1.338   | 1.697   | 0.997   | 1.229  | 1.150  |
| 47 | Furfurylmethylamphetamine                                              | 1026.202 | -      | 1.533   | 1.791   | 1.447   | 1.344   | 1.761  | 1.570   | 1.214   | 0.717   | 1.132   | 1.995   | 2.320   | 0.516   | 2.295   | 2.153   | 1.628   | 2.295   | 1.831  | 2.713  |
| 48 | (1S,4S,4aS)-1-Isopropyl-4,7-dimethyl-1,2,3,4,4a,5-hexahydronaphthalene | 1300.372 | -      | 2.296   | 2.402   | 2.027   | 2.082   | 1.945  | 2.077   | 2.237   | 1.979   | 2.635   | 2.271   | 2.261   | 2.572   | 2.476   | 2.093   | 2.714   | 2.911   | 2.544  | 3.107  |
| 49 | 1,2-Dihydro-4,5,7-trimethyl-naphthalene                                | 1303.274 | -      | 0.269   | 0.222   | 0.243   | 0.182   | 0.283  | 0.203   | 0.209   | 0.189   | 0.356   | 0.416   | 0.536   | 0.224   | 0.253   | 0.212   | 0.220   | 0.246   | 0.264  | 0.277  |
| 50 | Hexanoic anhydride                                                     | 1336.192 | -      | 0.940   | 0.926   | 0.601   | 0.288   | 0.606  | 0.379   | 1.006   | 0.446   | 0.810   | 0.736   | 0.826   | 0.941   | 0.442   | 0.467   | 0.378   | 0.589   | 0.495  | 0.349  |
| 51 | 2,4,6-Tri-tert-butylphenol                                             | 1496.924 | -      | 3.987   | 3.446   | 2.357   | 2.648   | 3.228  | 3.686   | 3.230   | 3.437   | 4.130   | 4.465   | 4.970   | 3.987   | 4.042   | 3.838   | 3.579   | 3.809   | 3.755  | 2.983  |

Note: -: Not found yet. RI<sup>a</sup>: The linear retention indices calculated from a series of n-alkanes (C7-C40). RI<sup>b</sup>: Retention indices referred to the literature value with same or equivalent chromatographic column shown on NIST Chemistry WebBook (<http://webbook.nist.gov/chemistry/>).

**Table S2.** Volatile compounds responsible for aroma of the black teas and their odor activity values (OAVs) and odor characteristics.

| NO | Name                                                                  | Odor Characteristics <sup>A</sup> | OTs (ug/L) <sup>B</sup> | OAVs   |        |        |        |        |        |        |        |        |        |        |        |        |        |        |        |        |        |
|----|-----------------------------------------------------------------------|-----------------------------------|-------------------------|--------|--------|--------|--------|--------|--------|--------|--------|--------|--------|--------|--------|--------|--------|--------|--------|--------|--------|
|    |                                                                       |                                   |                         | WSR1F0 | WSR1F1 | WSR1F2 | WSR1F3 | WSR1F4 | WSR1F5 | WSR2F0 | WSR2F1 | WSR2F2 | WSR2F3 | WSR2F4 | WSR3F0 | WSR3F1 | WSR3F2 | WSR3F3 | WSR4F0 | WSR4F1 | WSR4F2 |
| 2  | Hexanal                                                               | Fresh, green, fruity              | 4.5                     | 1.066  | 1.371  | 1.465  | 1.595  | 1.845  | 1.822  | 0.818  | 1.085  | 1.474  | 1.850  | 2.037  | 1.115  | 1.244  | 1.176  | 2.108  | 2.817  | 2.091  | 1.335  |
| 3  | trans-2-Hexenal                                                       | Green banana                      | 17                      | 0.327  | 0.691  | 0.485  | 0.626  | 0.495  | 0.503  | 0.391  | 0.549  | 0.682  | 0.559  | 0.465  | 0.227  | 0.778  | 0.666  | 0.865  | 0.951  | 0.670  | 0.701  |
| 6  | 2,5-Dihydroxybenzaldehyde                                             | -                                 | -                       | -      | -      | -      | -      | -      | -      | -      | -      | -      | -      | -      | -      | -      | -      | -      | -      | -      | -      |
| 8  | Styrene                                                               | Sweet, balsam, floral             | 730                     | 0.000  | 0.000  | 0.000  | 0.000  | 0.000  | 0.000  | 0.000  | 0.000  | 0.000  | 0.001  | 0.000  | 0.000  | 0.000  | 0.000  | 0.000  | 0.000  | 0.000  | 0.000  |
| 9  | β-Myrcene                                                             | Sweet, citrus                     | 13.5                    | 1.582  | 1.597  | 1.478  | 1.490  | 0.980  | 0.997  | 1.190  | 1.477  | 1.179  | 1.165  | 1.374  | 0.628  | 0.996  | 1.622  | 0.924  | 1.400  | 0.883  | 1.279  |
| 11 | β-Ocimene                                                             | Citrus, berbaceous, sweet         | 34                      | 0.149  | 0.157  | 0.140  | 0.159  | 0.104  | 0.106  | 0.118  | 0.150  | 0.112  | 0.136  | 0.144  | 0.030  | 0.110  | 0.168  | 0.096  | 0.153  | 0.094  | 0.138  |
| 12 | 3-Carene                                                              | Lemon, resin                      | 0.4                     | 16.954 | 18.910 | 16.853 | 15.248 | 11.936 | 12.574 | 13.142 | 13.539 | 14.215 | 16.190 | 16.833 | 8.380  | 13.781 | 16.658 | 10.567 | 14.364 | 10.946 | 15.024 |
| 14 | 1,5-Dimethyl-1,3-cyclohexadiene                                       | -                                 | -                       | -      | -      | -      | -      | -      | -      | -      | -      | -      | -      | -      | -      | -      | -      | -      | -      | -      | -      |
| 15 | Bicyclo[7.2.0]undec-4-ene,4,11,11-trimethyl-8-methylene-, (1R,4Z,9S)- | -                                 | -                       | -      | -      | -      | -      | -      | -      | -      | -      | -      | -      | -      | -      | -      | -      | -      | -      | -      | -      |
| 17 | α-Calacorene                                                          | Woody                             | -                       | -      | -      | -      | -      | -      | -      | -      | -      | -      | -      | -      | -      | -      | -      | -      | -      | -      | -      |
| 20 | Hydroxylamine, O-(diphenylmethyl)-                                    | -                                 | -                       | -      | -      | -      | -      | -      | -      | -      | -      | -      | -      | -      | -      | -      | -      | -      | -      | -      | -      |
| 25 | Geraniol                                                              | Mild, sweet rose fragrance        | 40                      | 6.568  | 6.012  | 6.478  | 5.180  | 5.707  | 5.784  | 5.387  | 5.121  | 6.657  | 6.171  | 6.357  | 6.542  | 6.283  | 4.216  | 5.401  | 6.985  | 3.416  | 3.251  |
| 27 | 2,6-Bis-tert-butyl-4-methylcyclohexanol                               | -                                 | -                       | -      | -      | -      | -      | -      | -      | -      | -      | -      | -      | -      | -      | -      | -      | -      | -      | -      | -      |
| 28 | τ-Cadinol                                                             | Tar, camphor and greasy           | 0.44                    | 10.677 | 9.021  | 10.616 | 9.455  | 11.282 | 10.840 | 11.294 | 10.373 | 12.341 | 12.067 | 10.459 | 0.179  | 0.293  | 0.180  | 0.349  | 0.315  | 0.232  | 0.232  |
| 30 | cis-5-Ethenyltetrahydro-α,α-5-trimethyl-2-furanmethanol               | Floral, sweet, woody              | -                       | -      | -      | -      | -      | -      | -      | -      | -      | -      | -      | -      | -      | -      | -      | -      | -      | -      | -      |
| 31 | Ethyl 2-(5-methyl-5-vinyltetrahydrofuran-2-yl)propan-2-yl carbonate   | Roasted, sweet                    | 320                     | 0.236  | 0.223  | 0.185  | 0.157  | 0.150  | 0.131  | 0.157  | 0.193  | 0.187  | 0.187  | 0.180  | 0.088  | 0.183  | 0.177  | 0.160  | 0.200  | 0.098  | 0.091  |

|    |                                      |                             |       |          |          |          |          |          |          |          |          |          |          |         |        |         |        |        |        |        |        |
|----|--------------------------------------|-----------------------------|-------|----------|----------|----------|----------|----------|----------|----------|----------|----------|----------|---------|--------|---------|--------|--------|--------|--------|--------|
| 33 | trans-Butanoic acid, 3-hexenyl ester | -                           | -     | -        | -        | -        | -        | -        | -        | -        | -        | -        | -        | -       | -      | -       | -      | -      | -      | -      | -      |
| 35 | n-Valeric acid cis-3-hexenyl ester   | Green, fruity               | -     | -        | -        | -        | -        | -        | -        | -        | -        | -        | -        | -       | -      | -       | -      | -      | -      | -      | -      |
| 38 | trans-Geranic acid methyl ester      | Green, fruity, flower       | -     | -        | -        | -        | -        | -        | -        | -        | -        | -        | -        | -       | -      | -       | -      | -      | -      | -      | -      |
| 39 | cis-3-Hexenyl cis-hexanoate          | Green, fruity               | -     | -        | -        | -        | -        | -        | -        | -        | -        | -        | -        | -       | -      | -       | -      | -      | -      | -      | -      |
| 40 | Hexyl hexanoate                      | Sweet, fruity               | 820   | 0.009    | 0.009    | 0.008    | 0.004    | 0.005    | 0.005    | 0.005    | 0.004    | 0.006    | 0.007    | 0.004   | 0.002  | 0.004   | 0.002  | 0.003  | 0.004  | 0.003  | 0.002  |
| 41 | 2,2,6-Trimethylcyclohexanone         | Honey, cistus               | 100   | 0.002    | 0.003    | 0.003    | 0.003    | 0.003    | 0.003    | 0.002    | 0.003    | 0.003    | 0.003    | 0.004   | 0.002  | 0.003   | 0.003  | 0.002  | 0.004  | 0.003  | 0.002  |
| 44 | β-Ionone                             | Woody and fruity            | 0.007 | 1074.313 | 1453.406 | 1645.816 | 1307.892 | 2022.196 | 1743.251 | 1381.336 | 1446.323 | 1572.640 | 2112.980 | 684.361 | 31.739 | 108.926 | 94.072 | 90.944 | 72.800 | 76.150 | 77.878 |
| 45 | 2-Ethylfuran                         | Butter, caramel-like, burnt | 8000  | 0.000    | 0.000    | 0.000    | 0.000    | 0.000    | 0.000    | 0.000    | 0.000    | 0.000    | 0.001    | 0.001   | 0.000  | 0.000   | 0.000  | 0.000  | 0.001  | 0.000  | 0.000  |
| 47 | Furfurylmethylamphetamine            | -                           | -     | -        | -        | -        | -        | -        | -        | -        | -        | -        | -        | -       | -      | -       | -      | -      | -      | -      | -      |
| 50 | Hexanoic anhydride                   | -                           | -     | -        | -        | -        | -        | -        | -        | -        | -        | -        | -        | -       | -      | -       | -      | -      | -      | -      | -      |
| 51 | 2,4,6-Tri-tert-butylphenol           | -                           | -     | -        | -        | -        | -        | -        | -        | -        | -        | -        | -        | -       | -      | -       | -      | -      | -      | -      | -      |

| NO | Name                                                                  | Odor Characteristics <sup>A</sup> | OTs (ug/L) <sup>B</sup> | OAV     |         |         |         |         |         |         |         |         |         |         |         |         |         |         |         |         |        |
|----|-----------------------------------------------------------------------|-----------------------------------|-------------------------|---------|---------|---------|---------|---------|---------|---------|---------|---------|---------|---------|---------|---------|---------|---------|---------|---------|--------|
|    |                                                                       |                                   |                         | SWR1F0  | SWR1F1  | SWR1F2  | SWR1F3  | SWR1F4  | SWR1F5  | SWR2F0  | SWR2F1  | SWR2F2  | SWR2F3  | SWR2F4  | SWR3F0  | SWR3F1  | SWR3F2  | SWR3F3  | SWR4F0  | SWR4F1  | SWR4F2 |
| 2  | Hexanal                                                               | Fresh, green, fruity              | 4.5                     | 0.199   | 0.416   | 0.461   | 0.719   | 0.403   | 0.439   | 0.643   | 0.207   | 0.631   | 0.654   | 0.933   | 0.428   | 0.687   | 0.528   | 1.264   | 0.911   | 0.456   | 1.416  |
| 3  | trans-2-Hexenal                                                       | Green banana                      | 17                      | 0.017   | 0.100   | 0.011   | 0.259   | 0.153   | 0.103   | 0.028   | 0.006   | 0.073   | 0.129   | 0.158   | 0.306   | 0.177   | 0.017   | 0.065   | 0.060   | 0.242   | 0.293  |
| 6  | 2,5-Dihydroxybenzaldehyde                                             | -                                 | -                       | -       | -       | -       | -       | -       | -       | -       | -       | -       | -       | -       | -       | -       | -       | -       | -       | -       | -      |
| 8  | Styrene                                                               | Sweet, balsam, floral             | 730                     | 0.000   | 0.000   | 0.000   | 0.000   | 0.000   | 0.000   | 0.000   | 0.000   | 0.000   | 0.000   | 0.000   | 0.000   | 0.000   | 0.000   | 0.001   | 0.000   | 0.000   | 0.000  |
| 9  | β-Myrcene                                                             | Sweet, citrus                     | 13.5                    | 1.591   | 1.486   | 1.539   | 1.431   | 1.198   | 1.775   | 1.478   | 1.451   | 1.601   | 1.608   | 1.825   | 1.409   | 1.822   | 1.909   | 2.316   | 1.820   | 1.688   | 1.921  |
| 11 | β-Ocimene                                                             | Citrus, berbaceous, sweet         | 34                      | 0.194   | 0.162   | 0.167   | 0.159   | 0.110   | 0.203   | 0.155   | 0.151   | 0.187   | 0.179   | 0.209   | 0.156   | 0.219   | 0.252   | 0.269   | 0.193   | 0.182   | 0.233  |
| 12 | 3-Carene                                                              | Lemon, resin                      | 0.4                     | 19.004  | 17.995  | 17.348  | 18.418  | 18.231  | 18.856  | 17.862  | 17.487  | 22.132  | 20.875  | 24.349  | 22.676  | 26.002  | 28.023  | 32.444  | 23.104  | 20.421  | 18.372 |
| 14 | 1,5-Dimethyl-1,3-cyclohexadiene                                       | -                                 | -                       | -       | -       | -       | -       | -       | -       | -       | -       | -       | -       | -       | -       | -       | -       | -       | -       | -       | -      |
| 15 | Bicyclo[7.2.0]undec-4-ene,4,11,11-trimethyl-8-methylene-, (1R,4Z,9S)- | -                                 | -                       | -       | -       | -       | -       | -       | -       | -       | -       | -       | -       | -       | -       | -       | -       | -       | -       | -       | -      |
| 17 | α-Calacorene                                                          | Woody                             | -                       | -       | -       | -       | -       | -       | -       | -       | -       | -       | -       | -       | -       | -       | -       | -       | -       | -       | -      |
| 20 | Hydroxylamine, O-(diphenylmethyl)-                                    | -                                 | -                       | -       | -       | -       | -       | -       | -       | -       | -       | -       | -       | -       | -       | -       | -       | -       | -       | -       | -      |
| 25 | Geraniol                                                              | Mild, sweet rose fragrance        | 40                      | 6.948   | 8.199   | 6.571   | 7.540   | 7.293   | 7.524   | 6.994   | 7.176   | 9.087   | 7.576   | 8.890   | 8.956   | 9.309   | 7.610   | 8.968   | 8.419   | 7.147   | 10.470 |
| 27 | 2,6-Bis-tert-butyl-4-methylcyclohexanol                               | -                                 | -                       | -       | -       | -       | -       | -       | -       | -       | -       | -       | -       | -       | -       | -       | -       | -       | -       | -       | -      |
| 28 | τ-Cadinol                                                             | Tar, camphor and greasy           | 0.44                    | 0.219   | 0.245   | 0.194   | 0.298   | 0.257   | 0.272   | 0.295   | 0.252   | 0.270   | 0.272   | 0.333   | 0.248   | 0.317   | 0.282   | 0.138   | 0.284   | 0.742   | 0.293  |
| 30 | cis-5-Ethenyltetrahydro-α,α-5-trimethyl-2-furanmethanol               | Floral, sweet, woody              | -                       | -       | -       | -       | -       | -       | -       | -       | -       | -       | -       | -       | -       | -       | -       | -       | -       | -       | -      |
| 31 | Ethyl 2-(5-methyl-5-vinyltetrahydrofuran-2-yl)propan-2-yl carbonate   | Roasted, sweet                    | 320                     | 0.214   | 0.212   | 0.213   | 0.235   | 0.251   | 0.229   | 0.208   | 0.187   | 0.294   | 0.236   | 0.253   | 0.184   | 0.285   | 0.249   | 0.283   | 0.264   | 0.208   | 0.293  |
| 33 | trans-Butanoic acid, 3-hexenyl ester                                  | -                                 | -                       | -       | -       | -       | -       | -       | -       | -       | -       | -       | -       | -       | -       | -       | -       | -       | -       | -       | -      |
| 35 | n-Valeric acid cis-3-hexenyl ester                                    | Green, fruity                     | -                       | -       | -       | -       | -       | -       | -       | -       | -       | -       | -       | -       | -       | -       | -       | -       | -       | -       | -      |
| 38 | trans-Geranic acid methyl ester                                       | Green, fruity, flower             | -                       | -       | -       | -       | -       | -       | -       | -       | -       | -       | -       | -       | -       | -       | -       | -       | -       | -       | -      |
| 39 | cis-3-Hexenyl cis-hexanoate                                           | Green, fruity                     | -                       | -       | -       | -       | -       | -       | -       | -       | -       | -       | -       | -       | -       | -       | -       | -       | -       | -       | -      |
| 40 | Hexyl hexanoate                                                       | Sweet, fruity                     | 820                     | 0.002   | 0.001   | 0.001   | 0.001   | 0.001   | 0.001   | 0.001   | 0.001   | 0.001   | 0.001   | 0.001   | 0.001   | 0.002   | 0.001   | 0.001   | 0.001   | 0.001   | 0.001  |
| 41 | 2,2,6-Trimethylcyclohexanone                                          | Honey, cistus                     | 100                     | 0.001   | 0.001   | 0.002   | 0.001   | 0.002   | 0.002   | 0.001   | 0.001   | 0.002   | 0.002   | 0.002   | 0.001   | 0.002   | 0.002   | 0.002   | 0.002   | 0.002   | 0.002  |
| 44 | β-Ionone                                                              | Woody and fruity                  | 0.007                   | 205.981 | 114.297 | 109.283 | 123.315 | 158.397 | 136.819 | 123.968 | 157.210 | 231.167 | 177.036 | 226.629 | 201.362 | 160.768 | 120.050 | 107.086 | 166.519 | 193.382 | 87.750 |
| 45 | 2-Ethylfuran                                                          | Butter, caramel-like, burnt       | 8000                    | 0.000   | 0.000   | 0.000   | 0.000   | 0.000   | 0.000   | 0.000   | 0.000   | 0.000   | 0.000   | 0.000   | 0.000   | 0.000   | 0.000   | 0.000   | 0.000   | 0.000   | 0.000  |
| 47 | Furfurylmethylamphetamine                                             | -                                 | -                       | -       | -       | -       | -       | -       | -       | -       | -       | -       | -       | -       | -       | -       | -       | -       | -       | -       | -      |
| 50 | Hexanoic anhydride                                                    | -                                 | -                       | -       | -       | -       | -       | -       | -       | -       | -       | -       | -       | -       | -       | -       | -       | -       | -       | -       | -      |
| 51 | 2,4,6-Tri-tert-butylphenol                                            | -                                 | -                       | -       | -       | -       | -       | -       | -       | -       | -       | -       | -       | -       | -       | -       | -       | -       | -       | -       | -      |

Note: OTs: Odor thresholds in water. The values were according to the reported references. A、B: (<http://www.thegoodscentscopy.com/search3.php?qOdor>; (Flaig, Qi, Wei, Yang, & Schieberle, 2020; Guo et al., 2021; H. Wang et al., 2020; M. Wang et al., 2020; Zhu et al., 2021; Zhu et al., 2018; Niu, Yao, Xiao, & Wu, 2016; Shu et al., 2016; Q., Zhang et al., 2019))
